# Supplementary material for: Enhancing the solubility and thermostability of nitrilase through surface hydrophobic residue engineering
Source: Research Square preprint supplement (doi:10.21203/rs.3.rs-8812779/v1), 2026-02-11
Supplement: Supplementary file 1 [file c3683777e400d5c351a0f472.docx]

**Supporting Information**

**Enhancing the solubility and thermostability of nitrilase through surface hydrophobic residue engineering**

Ziyi Li1, Yina Ren1, Yuxuan Jiang1, Chenlan Yan1, Yiqi Deng1, Yiyi Li1, Zhemin Zhou*1,2, Laichuang Han*1,2

1 Key Laboratory of Industrial Biotechnology (Ministry of Education), School of Biotechnology, Jiangnan University, Wuxi, Jiangsu, China

2 Key Laboratory of Industrial Synthetic Biology of Jiangsu Province, Jiangnan University, Wuxi, Jiangsu, 214122, China

*Corresponding authors:

Zhemin Zhou,

Key Laboratory of Industrial Biotechnology (Ministry of Education), School of Biotechnology, Jiangnan University.

Key Laboratory of Industrial Synthetic Biology of Jiangsu Province, Jiangnan University

Wuxi, Jiangsu, 214122, China

E-mail: zhmzhou@jiangnan.edu.cn

Laichuang Han,

Key Laboratory of Industrial Biotechnology (Ministry of Education), School of Biotechnology, Jiangnan University.

Key Laboratory of Industrial Synthetic Biology of Jiangsu Province, Jiangnan University

Wuxi, Jiangsu, 214122, China

E-mail: hanlaichuang@jiangnan.edu.cn

**Contents**

[Figure S1 SDS-PAGE analysis of sfGFP fused proteins 3](#_Toc25279)

[Figure S2 SDS-PAGE analysis of the purified enzyme 4](#_Toc23034)

[Table S1 Plasmids and strains 5](#_Toc23126)

[Table S2 Primers 6](#_Toc20945)


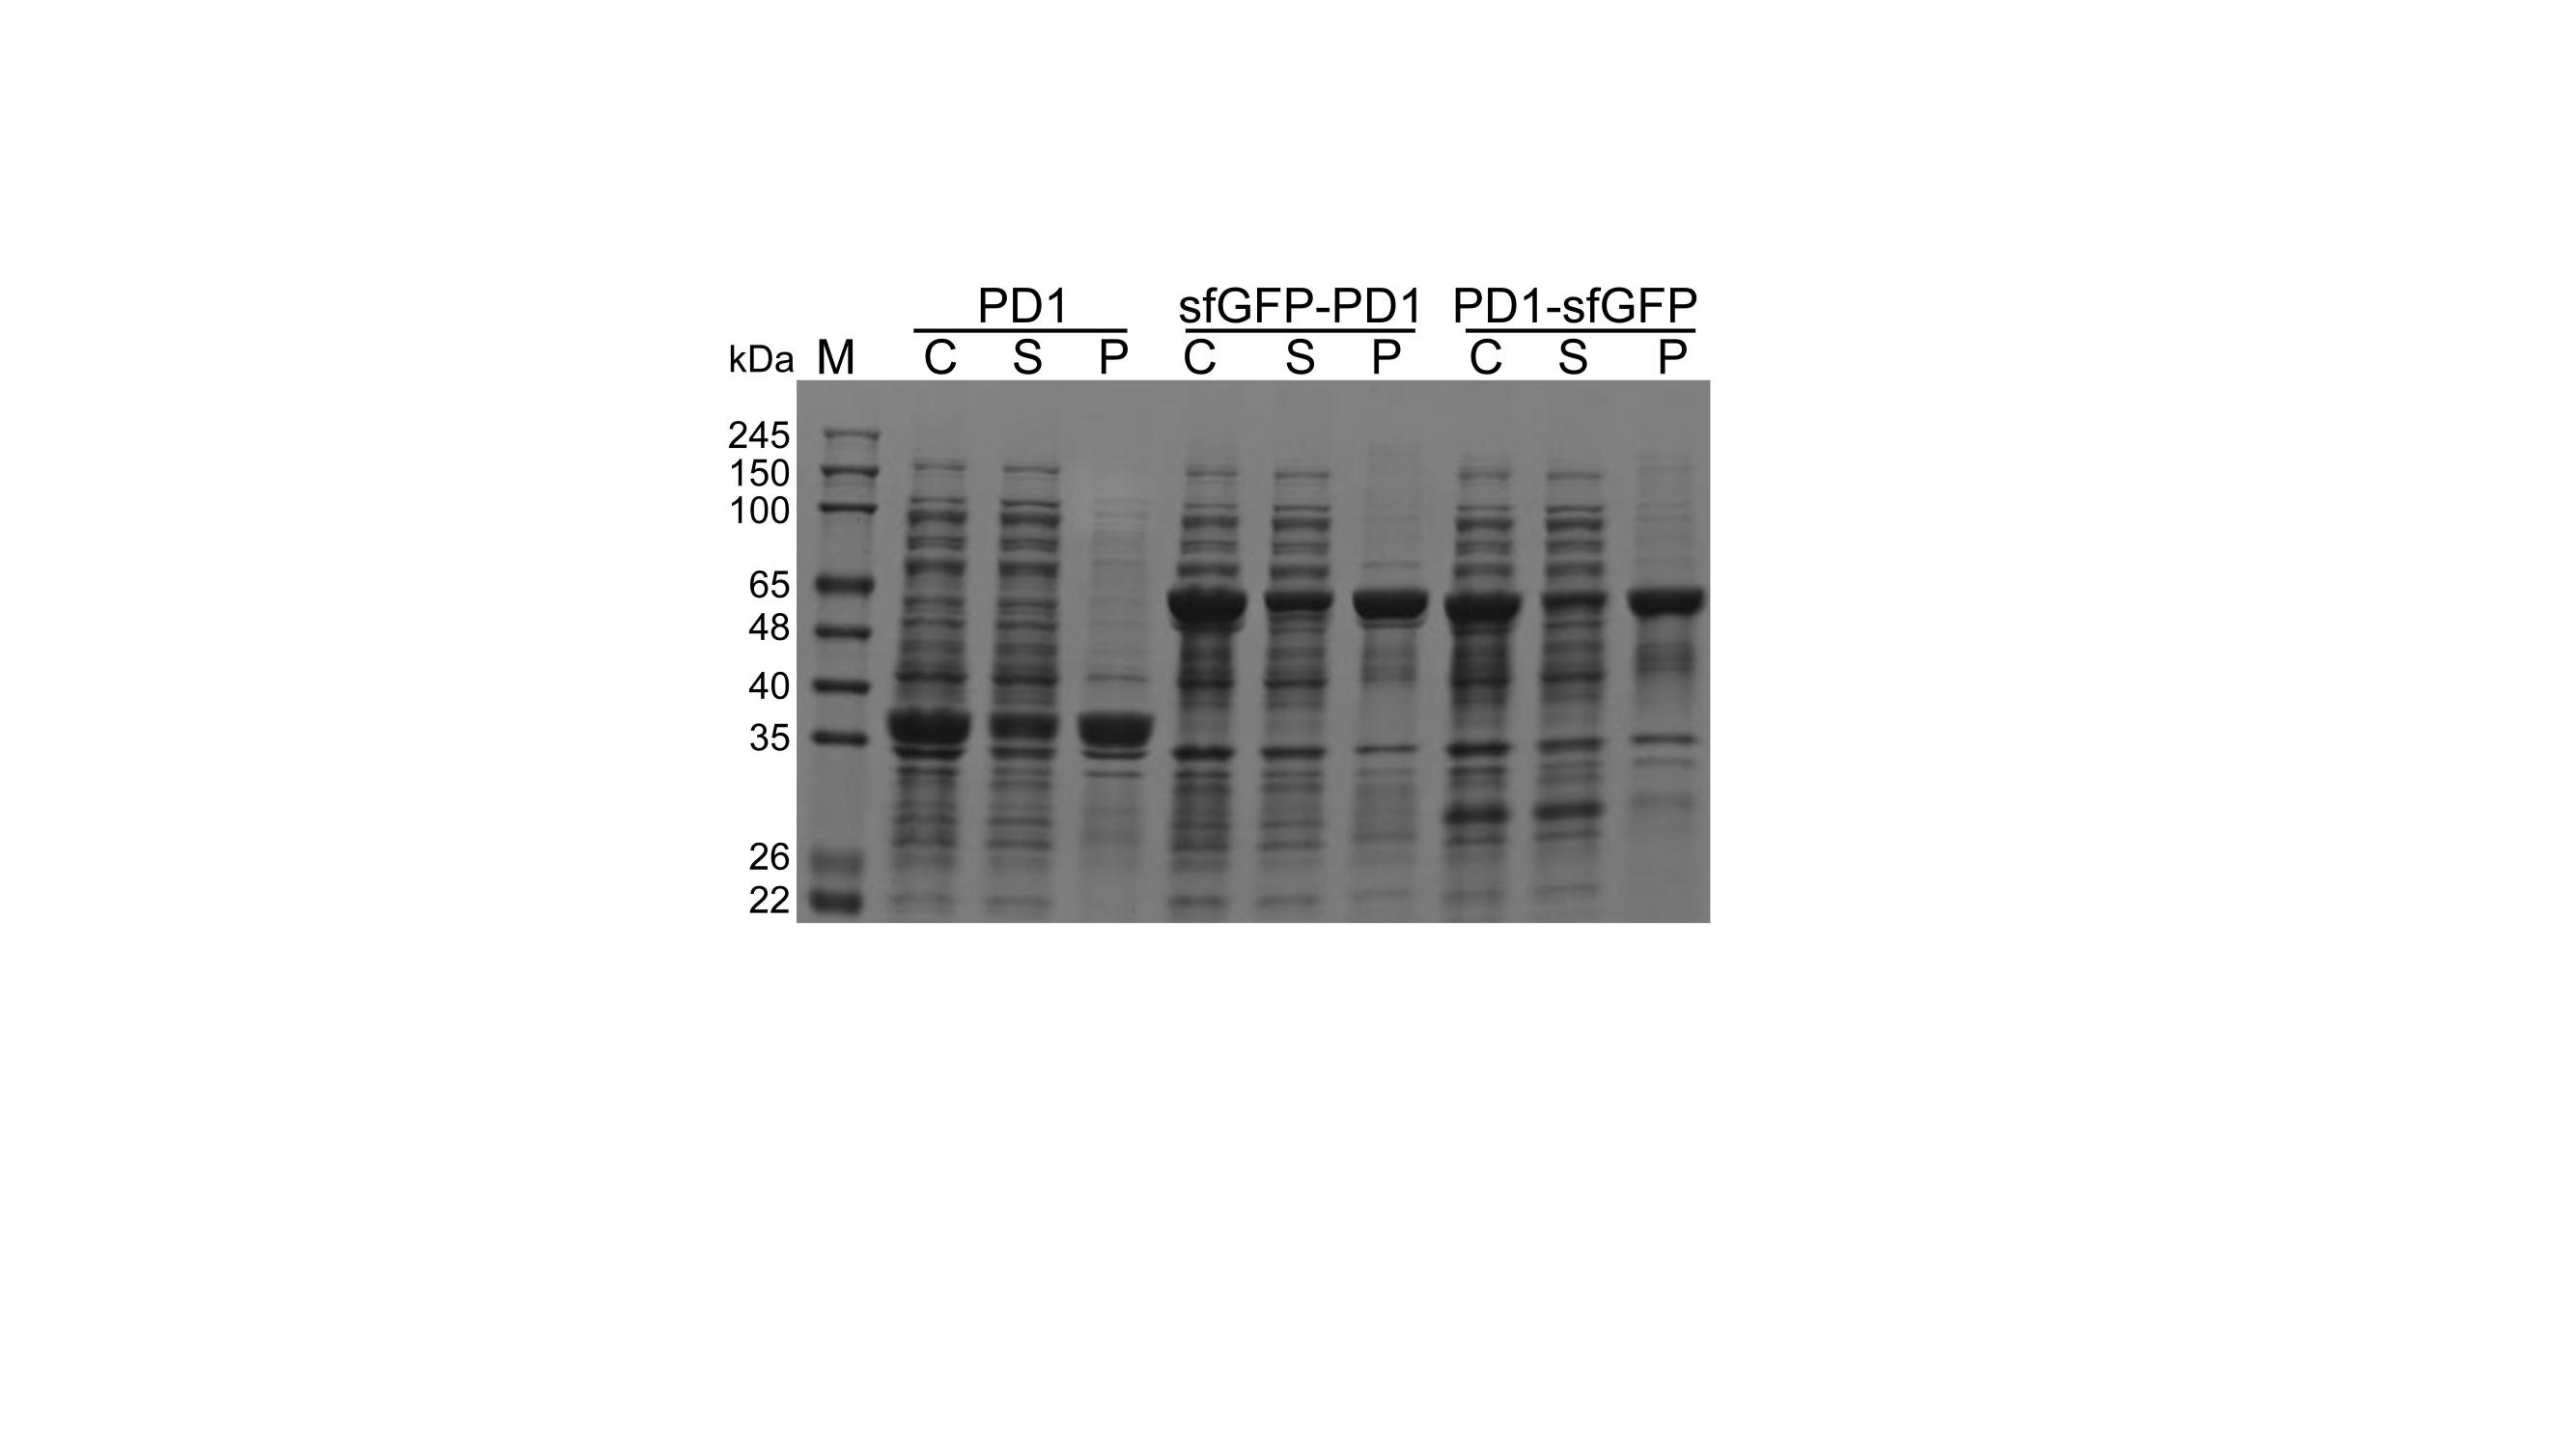


# Figure S1 SDS-PAGE analysis of sfGFP fused proteins

PD1, sfGFP-PD1, and PD1-sfGFP are constructs representing the absence of sfGFP fusion, sfGFP fusion at the N-terminus, and sfGFP fusion at the C-terminus, respectively. Protein bands were stained with Coomassie Brilliant Blue. C, whole cells; S, Supernatant after cell lysis; P, Precipitate after cell lysis. M means marker.


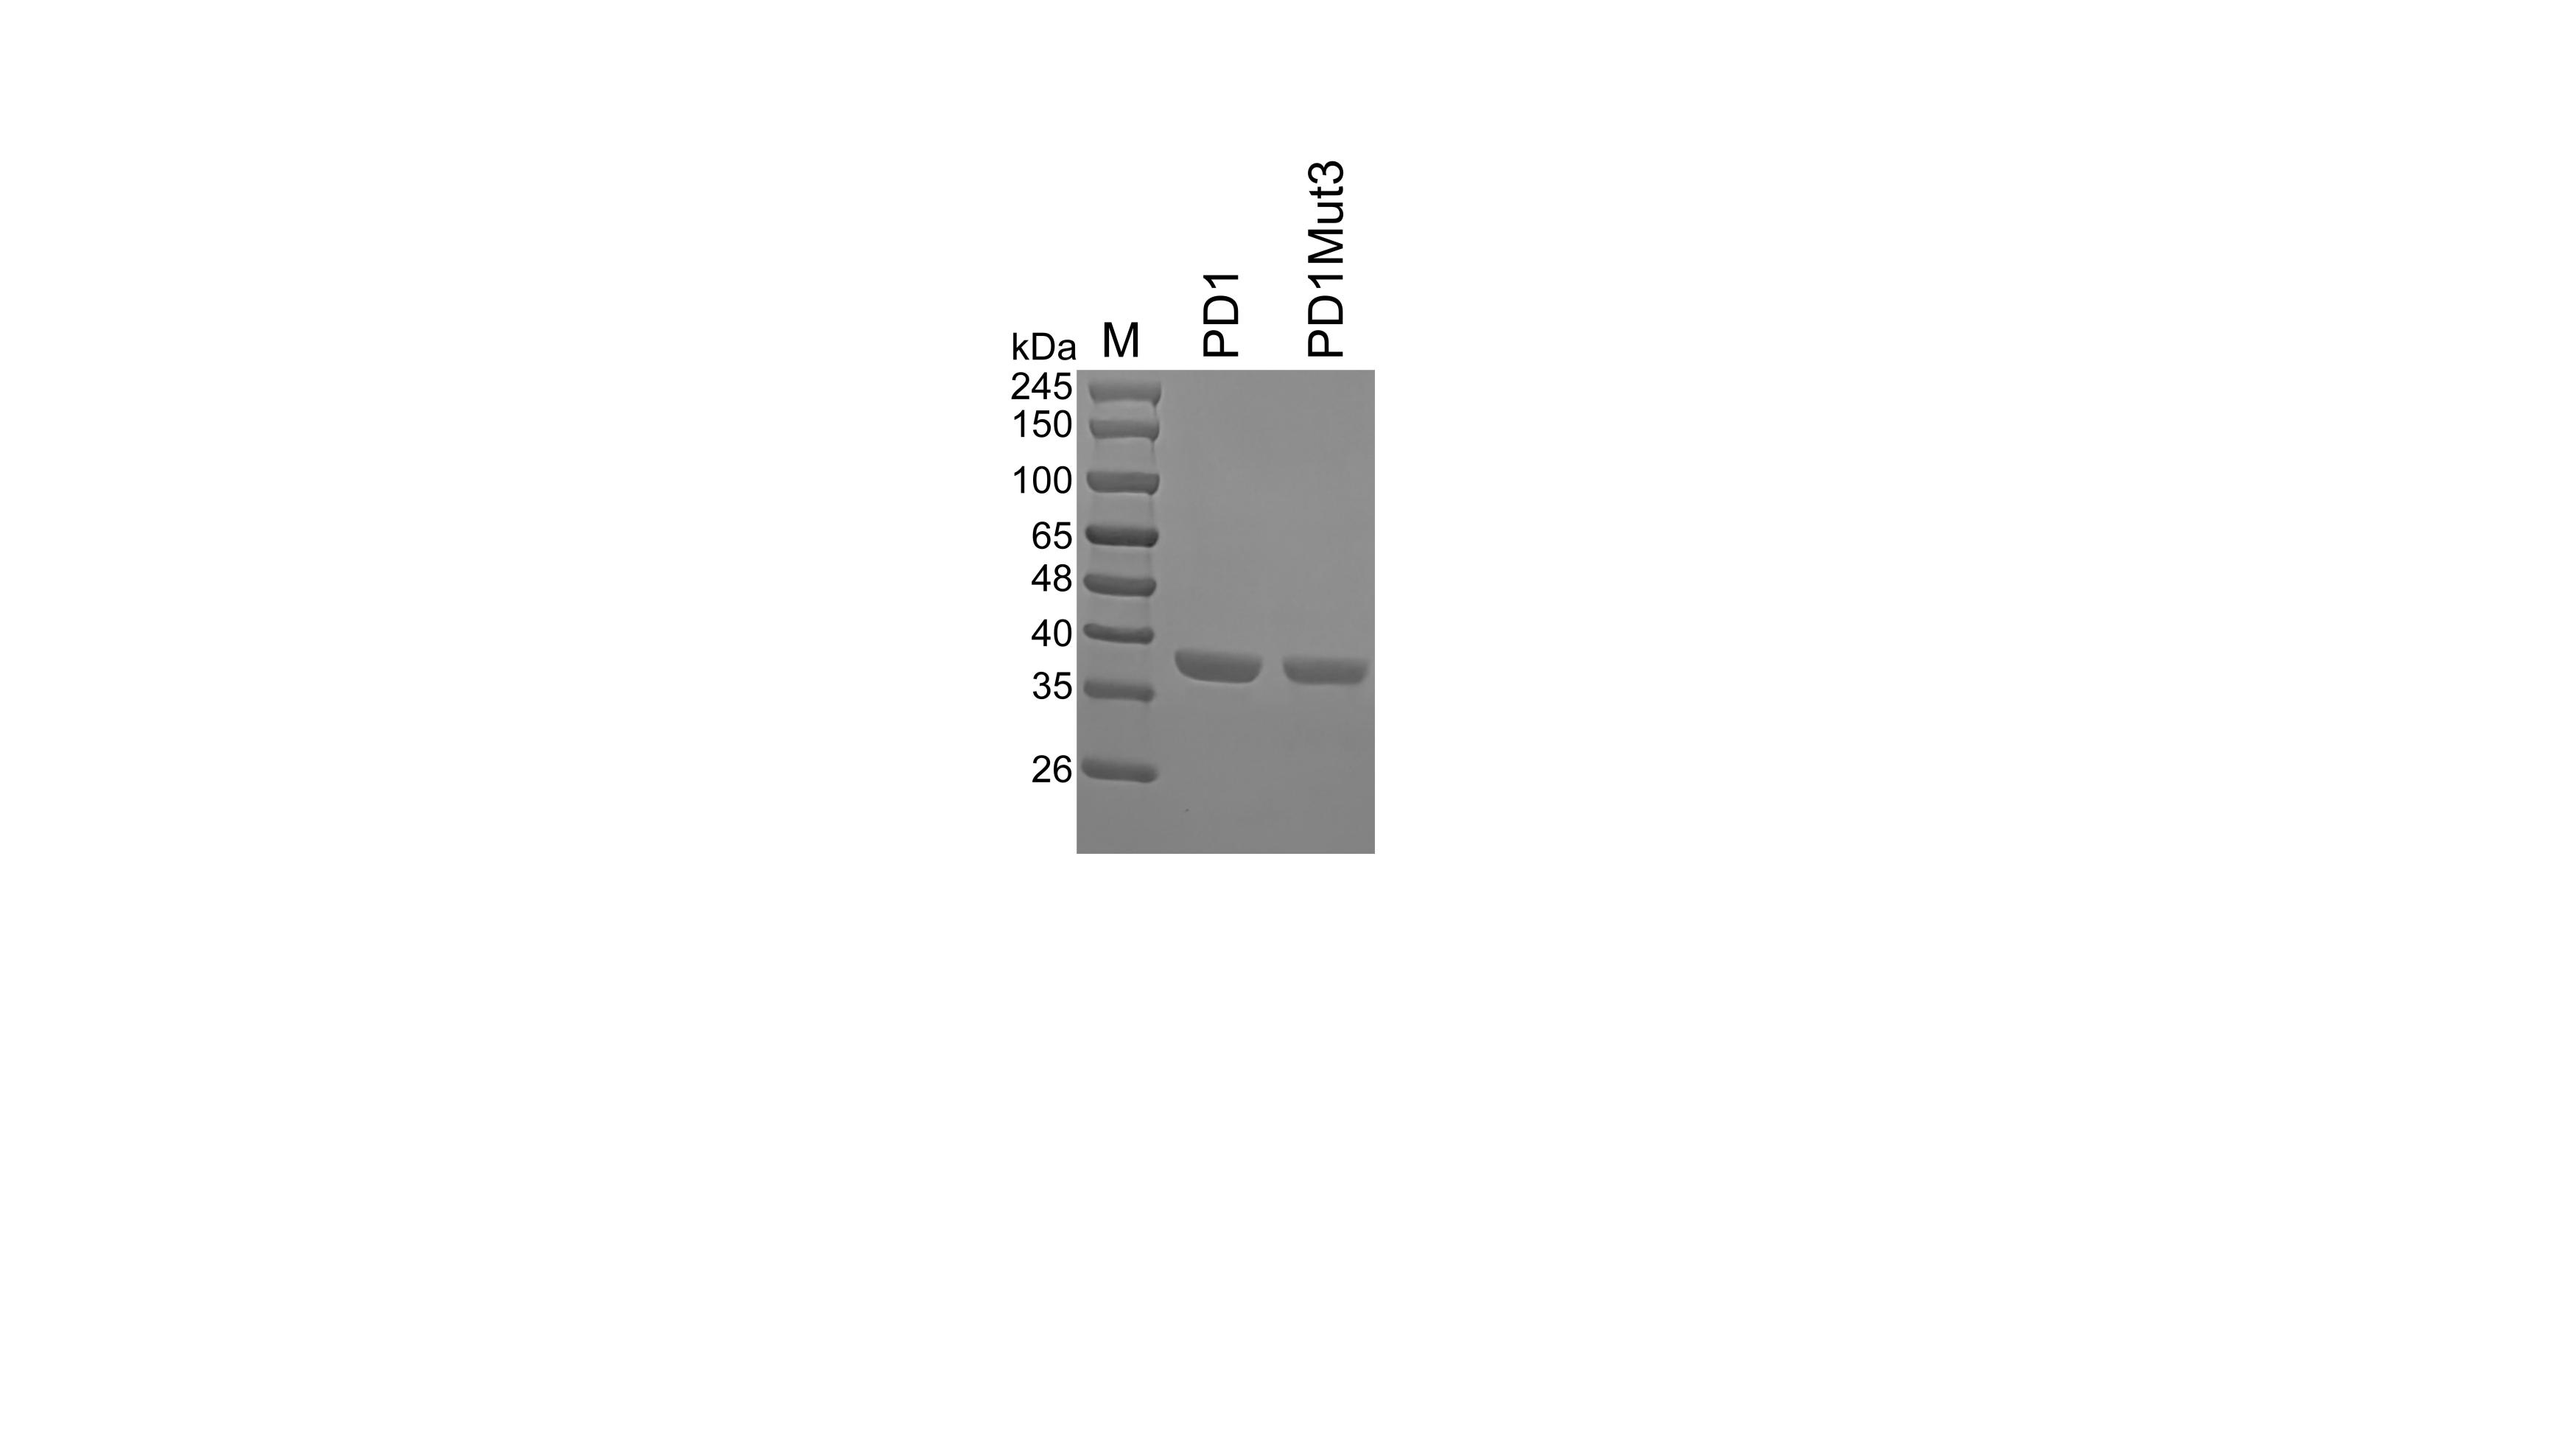


# Figure S2 SDS-PAGE analysis of the purified enzyme

The purified enzyme was subjected to SDS-PAGE to determine its purity. Protein bands were stained with Coomassie Brilliant Blue. M means marker.

# Table S1 Plasmids and strains

| Plasmids and strains | Relevant characteristics | References or source |
| --- | --- | --- |
| Plasmids |  |  |
| pET24a-PD1 | Derived from pET24a(+), the mutant PD1 of the nitrilase Nit6803 was expressed by PT7-lac | Lab stork |
| pET24a-PD1-sfGFP | Derived from pET24a-PD1, sfGFP was fused to the C-terminus of PD1 | This study |
| pET24a-sfGFP-PD1 | Derived from pET24a-PD1, sfGFP was fused to the N-terminus of PD1 | This study |
| pET24a-PD1Mut3 | Derived from pET24a-PD1, the triple mutations I5S/V69C/I201T were introduced into PD1 | This study |
| Strains |  |  |
| *E.coli* ER2566 | *F- λ- fhuA2 [lon] ompT lacZ::T7p07 gal sulA11 Δ(mcrC-mrr)114::IS10 R(mcr-73::miniTn10-TetS)2 R(zgb-210::Tn10)(TetS) endA1 [dcm]* | Lab stork |

# Table S2 Primers

| Primers | Sequences (5’-3’) |
| --- | --- |
| PI5-NNK-1 | ATATACATATGCTGGGCAAANNKATGCTGAACTATACCAAAAACATTC |
| PI5-NNK-2 | TTTGCCCAGCATATGTATATCTCC |
| PF25-NNK-1 | CAGATTAGCCCGGTGCTGNNKAGTCAGCAAGGCACCATGG |
| PF25-NNK-2 | CAGCACCGGGCTAATCTGCG |
| PV69-NNK-1 | AGCTTTGTGGAACCGCCGNNKCTGATGGGCAAAAGCCATC |
| PV69-NNK-2 | CGGCGGTTCCACAAAGCTAAAATAC |
| PL70-NNK-1 | TTTGTGGAACCGCCGGTGNNKATGGGCAAAAGCCATCTGAAAC |
| PL70-NNK-2 | CACCGGCGGTTCCACAAAGCTA |
| PI201-NNK-1 | GGCAGCTTCCTGGGTCAGNNKTTTGCGGATCAGATGGAAGTG |
| PI201-NNK-2 | CTGACCCAGGAAGCTGCCCG |
| PL234-NNK-1 | GGCTGACCGATGAACAGAAANNKCAGATTACCACCGATGAAAAAATGC |
| PL234-NNK-2 | TTTCTGTTCATCGGTCAGCCAGCC |
| PI5S-1 | ATATACATATGCTGGGCAAAAGCATGCTGAACTATACCAAAAACATTC |
| PF25N-1 | CAGATTAGCCCGGTGCTGAACAGTCAGCAAGGCACCATGG |
| PV69C-1 | AGCTTTGTGGAACCGCCGTGCCTGATGGGCAAAAGCCATC |
| PI201T-1 | GGCAGCTTCCTGGGTCAGACCTTTGCGGATCAGATGGAAGTG |
